# Supplementary material
Source: HighWire-hosted journal article supplement (https://thorax.bmj.com/content/thoraxjnl-2016-209553)
Supplement: inline-supplementary-material-1 [file inline-supplementary-material-1.pdf]

Respiratory viruses in healthy infants and infants with Cystic Fibrosis: A prospective cohort study.

Insa Korten, Elisabeth Kieninger, Shkipe Klenja, Ines Mack, Njima Schläpfer, Maria Teresa Barbani, Nicolas Regamey, Claudia E. Kuehni, Markus Hilty, Urs Frey, Meri Gorgievski, Carmen Casaulta, Philipp Latzin for the SCILD and BILD study group

**Online supplementary material**

## 1 **METHODS**

### 2 Study design and subjects:

3 Details on inclusion and exclusion criteria for the study subjects:

4 In the SCILD study, CF infants were recruited after they had been diagnosed with the Swiss  
5 neonatal screening for CF. Infants were enrolled in the study shortly after diagnosis,  
6 irrespective of symptoms. In the BILD study, pregnant mothers were recruited at maternity  
7 hospitals and practices of obstetricians by advertisements and interviews. Exclusion criteria  
8 for the CF cohort were severe comorbidities, exclusion criteria for the healthy cohort were:  
9 ethnicity other than white, preterm delivery (<37 weeks), major birth defects, disease or later  
10 diagnosis of airway malformation or specific chronic respiratory disease.

### 11 Nasal swab procedure:

12 An anterior nasal swab (FLOQSwabs™, in UTM-RT™ (Copan, Italia)) was collected  
13 biweekly by parents in 31 infants with CF and 32 healthy infants after being instructed by  
14 study nurses about correct and standardized sampling of the swabs, starting in the 5<sup>th</sup> week of  
15 life. Immediately after acquisition, nasal swabs were sent by mail to our study center and  
16 frozen at -80° C, which took a median (IQR) 2 (1-4) days in both study cohorts. Ten different  
17 viruses and two atypical bacteria were analyzed in each sample.

### 18 Virological analysis:

19 The following viruses and atypical bacteria were used as outcome parameters in our analysis:  
20 Influenza A, Influenza B, RSV, Human Metapneumovirus (hMpV), Adenovirus (ADV),  
21 Bocavirus (hBoV), Rhinovirus/Enterovirus (HRV), Parechovirus (hPeV), Coronavirus  
22 (hCoV), Parainfluenzavirus (hPIV), *Mycoplasma pneumoniae* (M. pneumoniae) and  
23 *Chlamydia pneumoniae* (C. pneumoniae).

24 Real time PCR using a combination of 7 duplex Respiratory Multi Well System r-gene™  
25 (Influenza A/B, RSV/hMPV, Rhino&EV/CC, ADV/hBoV, HCoV/HPIV, Chla/Myco pneumo

26 and Parechovirus) commercialized by Argene/bioMérieux (Marcy l'Etoile, France) was  
27 performed according to the manufacturer's instructions to analyze the samples. RNA and  
28 DNA were extracted from a 400ul sample with the NucliSENS easyMAG (bioMérieux,  
29 Marcy l'Etoile, France) and eluted in 110ul.

30 The real time PCR was performed on different real time PCR machines of Applied  
31 Biosystems (7500, 7900HT, QuantStudio® 7 Flex). Sampling quality, extraction and  
32 amplification in every sample was evaluated using a HPRT1 cellular gene control (CC) assay  
33 using the duplex Rhino&EV/CC r-gene. Samples showing an exponential amplification curve  
34 with a CT (crossing threshold) value  $\leq 40$  were considered as positive. This crossing threshold  
35 was applied in all samples, irrespective of viral detection. The PCR tests were done by a  
36 certified laboratory which has routinely used the CE marked Respiratory Multi Well System  
37 r-gene™ for the detection of respiratory viruses since 2012.

38

#### 39 Statistical analysis and sensitivity analyses:

40 Despite rigid sampling instructions, the number of weeks with missing samples was higher in  
41 the group of infants with CF (n=125 vs. n=83). In order to assess whether this could have  
42 biased our results, we performed additional statistical analyses. First, we investigated the  
43 occurrence of respiratory symptoms in weeks during which nasal swabs were not taken due to  
44 e.g. vacation. No difference was found for any kind of respiratory symptoms between healthy  
45 infants and infants with CF (OR 0.69, 95% CI 0.17 – 2.75, p=0.6). This was especially true  
46 for episodes with respiratory infections, assuring us that missing samples in infants with CF  
47 were not due to e.g. hospitalization or infections.

48 A sample size of 25 children in each group provided a 90% power to detect differences in  
49 viral detection, at a two sided 5% significance level, given comparable distribution as shown  
50 before (1).

## REFERENCES

1. Dijkema JS, van Ewijk BE, Wilbrink B, Wolfs TF, Kimpen JL, van der Ent CK. Frequency and Duration of Rhinovirus Infections in Children with Cystic Fibrosis and Healthy Controls: A Longitudinal Cohort Study. *Pediatr Infect Dis J* 2016; 35: 379-383.

## Tables

**Table E1:** Sensitivity analysis for difference in viral detection in healthy infants and infants with CF

|                             |        | CF       | healthy  | Adjusted model |             |          |
|-----------------------------|--------|----------|----------|----------------|-------------|----------|
|                             |        | N (%)    | N (%)    | OR             | 95% CI      | <i>p</i> |
| Symptomatic viral detection |        |          |          |                |             |          |
| 1.                          | CT 45  | 96 (17)  | 163 (23) | 0.65           | 0.44 – 0.96 | 0.032    |
| 2.                          | CT 35  | 89 (17)  | 160 (24) | 0.62           | 0.43 – 0.91 | 0.015    |
| 3.                          | CT 40+ | 108 (18) | 164 (22) | 0.73           | 0.50 – 1.07 | 0.1      |
| 4.                          | CT 40b | 90 (17)  | 163 (23) | 0.64           | 0.43 – 0.96 | 0.03     |
| HRV detection               |        |          |          |                |             |          |
| 1.                          | CT 45  | 84 (15)  | 145 (20) | 0.6            | 0.40 – 0.91 | 0.016    |
| 2.                          | CT 35  | 82 (16)  | 138 (21) | 0.64           | 0.43 – 0.95 | 0.026    |
| 3.                          | CT 40+ | 94 (16)  | 145 (20) | 0.63           | 0.41 – 0.98 | 0.04     |
| 4.                          | CT 40b | 80 (15)  | 143 (20) | 0.63           | 0.42 – 0.95 | 0.028    |
| Symptomatic HRV detection   |        |          |          |                |             |          |
| 1.                          | CT 45  | 39 (7)   | 78 (11)  | 0.51           | 0.30 – 0.89 | 0.017    |
| 2.                          | CT 35  | 38 (7)   | 76 (11)  | 0.52           | 0.30 – 0.9  | 0.02     |
| 3.                          | CT 40+ | 39 (7)   | 78 (11)  | 0.49           | 0.28 – 0.85 | 0.011    |
| 4.                          | CT 40b | 38 (7)   | 78 (11)  | 0.54           | 0.31 – 0.93 | 0.028    |

Adjusted OR (season and age) for viral detection and symptomatic viral detection comparing healthy and CF infants from multilevel logistic regression in 4 different

---

models:

1. CT cut off value of 45
2. CT cut off value of 35
3. CT cut off value of 40, but including all samples positive for virus irrespective of CT value
4. CT cut off value of 40, but excluding 3 infants with CF with more than 50% of low quality samples.

In sensitivity analysis 1,2 and 4 the CT thresholds refer to sample quality using the HPRT1 cell gene control and not the detection thresholds for respiratory viruses. For HRV analysis samples with co-detection of other viruses were excluded.

baseline= healthy infants, OR = Odds Ratio, CI= Confidence Interval, p = p-value  
total number of samples N(%)
