# Supplementary material
Source: HighWire-hosted journal article supplement (https://thorax.bmj.com/content/thoraxjnl-2016-209553)
Supplement: inline-supplementary-material-3 [file inline-supplementary-material-3.pdf]

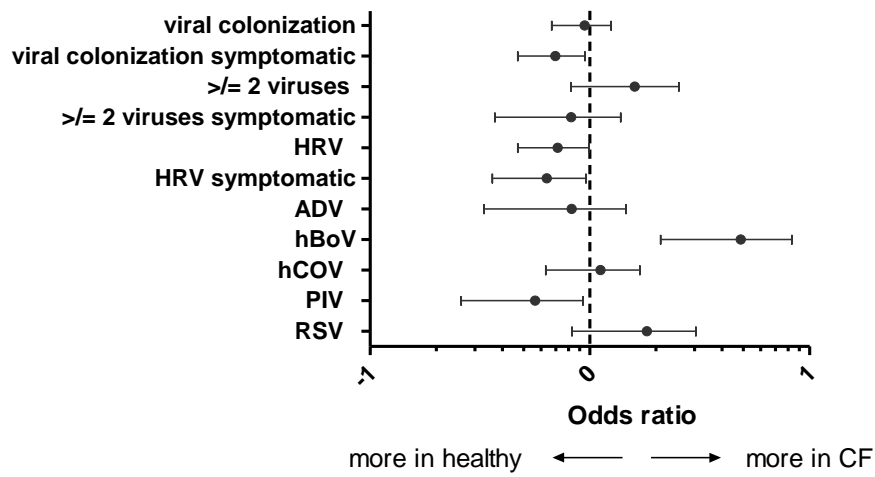

**Figure E 2: Viral detection of the different viruses**

Viral detection of the different viruses in healthy infants and infants with CF displayed as Odds Ratios (95%CI), displayed in log odds.

Baseline are healthy infants.
